# Supplementary material
Source: Research Square preprint supplement (doi:10.21203/rs.3.rs-9828682/v1)
Supplement: Supplementary file 1 [file 83e3310ebcbf27020ad92f37.docx]

Studies from databases/registers **(n = 347)**

PsycINFO (n = 147)

Google Scholar (n = 112)

Citation searching (n = 60)

Scopus (n = 18)

PubMed (n = 10)

References from other sources **(n = )**

Citation searching (n = )

Grey literature (n = )

**Identification**

Included studies ongoing **(n = 0)**

Studies awaiting classification **(n = 0)**

Studies included in review **(n = 35)**

Studies excluded **(n = 71)**

Studies not retrieved **(n = 0)**

Studies assessed for eligibility **(n = 163)**

Studies sought for retrieval **(n = 163)**

Studies screened **(n = 234)**

Studies excluded **(n = 128)**

Duplicate (n = 2)

Wrong setting (n = 9)

Wrong outcomes (n = 6)

Different Population (n = 42)

Masters Dissertation (n = 5)

Full Text Not Available (n = 49)

Excluded Special educators (n = 1)

Non-empirical study (editorials, commentary, etc) (n = 7)

Oral Presentation/ Conference Presentation/ Poster Presentation (n = 4)

Orla Presentation/ Conference Presentation/ Poster Presentation (n = 1)

References removed **(n = 113)**

Duplicates identified manually (n = 0)

Duplicates identified by Covidence (n = 113)

Marked as ineligible by automation tools (n = 0)

Other reasons (n = )

**Screening**

**Included**

Studies from databases/registers **(n = 347)**

PsycINFO (n = 147)

Google Scholar (n = 112)

Citation searching (n = 60)

Scopus (n = 18)

PubMed (n = 10)

References from other sources **(n = )**

Citation searching (n = )

Grey literature (n = )

**Identification**

Included studies ongoing **(n = 0)**

Studies awaiting classification **(n = 0)**

Studies included in review **(n = 35)**

Studies excluded **(n = 71)**

Studies not retrieved **(n = 0)**

Studies assessed for eligibility **(n = 163)**

Studies sought for retrieval **(n = 163)**

Studies screened **(n = 234)**

Studies excluded **(n = 128)**

Duplicate (n = 2)

Wrong setting (n = 9)

Wrong outcomes (n = 6)

Different Population (n = 42)

Masters Dissertation (n = 5)

Full Text Not Available (n = 49)

Excluded Special educators (n = 1)

Non-empirical study (editorials, commentary, etc) (n = 7)

Oral Presentation/ Conference Presentation/ Poster Presentation (n = 4)

Orla Presentation/ Conference Presentation/ Poster Presentation (n = 1)

References removed **(n = 113)**

Duplicates identified manually (n = 0)

Duplicates identified by Covidence (n = 113)

Marked as ineligible by automation tools (n = 0)

Other reasons (n = )

**Screening**

**Included**
