# Supplementary material
Source: Research Square preprint supplement (doi:10.21203/rs.3.rs-9828682/v1)
Supplement: Supplementary file 2 [file 9ec3b357bc101244b7436d6a.docx]

**The Emotional Cost of Caring: A Scoping Review on Compassion Fatigue in Special Educators**

Nidhi Kulkarni1, Abdul Raffie Naik2*

1Research Scholar, VIT-AP University, Andhra Pradesh-522241,

E-mail: nidhi.24phd7098@vitap.ac.in

2*Assistant Professor, Cabin -I, Room No-225, Academic Block 2 (AB-2), VIT-AP University, Near AP Secretariat, Andhra Pradesh-522241,

E-mail: abdulraffienaik@gmail.com (Corresponding author)

**Abstract**

**Introduction:** Sustainable Development Goal-4 emphasizes the need for inclusive and equitable quality education of children with disabilities by 2030. However, persistent shortages of qualified special and inclusive educators continue to hinder this goal. Simultaneously, the rising global prevalence of neurodevelopmental disorders has increased the demand for special educators. While global literature has extensively explored systemic and institutional barriers contributing to attrition in this field, there remains a critical need for deeper inquiry into the personal and psychological factors impacting the professional quality of life among special educators. Compassion fatigue, defined as psychological distress resulting from sustained exposure to others’ suffering or trauma, comprises two primary dimensions: burnout and secondary traumatic stress. Although research on compassion fatigue within special education has gained traction over the past decade, existing studies remain fragmented. A synthesized scoping review is necessary to consolidate current findings, identify knowledge gaps, and guide future research.

**Method & Analysis:** This scoping review will be conducted following Arksey and O’Malley’s methodological framework, supported by the Joanna Briggs Institute (JBI) checklist for critical appraisal, and reported in accordance with the PRISMA-ScR (Preferred Reporting Items for Systematic Reviews and Meta-Analyses Extension for Scoping Reviews) guidelines. Peer-reviewed full-text articles published in English between 1995 and 2025 that investigate compassion fatigue among special educators will be included. Literature searches will be conducted using four databases: Google Scholar, PsycINFO, PubMed, and Scopus.

**Ethical considerations:** As this review involves secondary analysis of published literature without the inclusion of human or animal participants, ethical clearance is not required. A Patient and Public Involvement (PPI) statement has been provided in accordance with JBI recommendations. Additionally, the protocol for this scoping review has been prospectively registered on the Open Science Framework (OSF).

**Keywords:** *scoping review, special educators, special education teachers, compassion fatigue, professional quality of life*

**Strengths and limitations of this study**

- This scoping review will be one of the first attempts to systematically map the evidence on compassion fatigue among special educators, a critically underexplored concept in special educator well-being.
- A transparent and rigorous methodology will be followed, guided by the Arksey and O’Malley (2005) framework and reported in line with the PRISMA-ScR guidelines.
- The protocol has been prospectively registered on the Open Science Framework (OSF), enhancing transparency and reproducibility.
- The quality of included studies will be appraised using the Joanna Briggs Institute (JBI) critical appraisal checklists to assess the strength of the evidence base.
- Only English-language, peer-reviewed studies will be included, which may result in language and publication bias by excluding potentially relevant grey and non-English literature.

**Introduction**

Disability, defined by the World Health Organization (2000) as an impairment, limitation, or restriction arising from health conditions or environmental factors, continues to affect millions of children worldwide. Recent estimates suggest that over 10.1% of children aged 0–17 years live with moderate-to-severe disabilities, with South Asia alone accounting for 27.3% of this population, reflecting a substantial regional burden (Olusanya et al., 2022). The growing prevalence of neurodevelopmental conditions has further intensified the demand for inclusive education systems (Olusanya et al., 2018). In response, the United Nations’ Sustainable Development Goals-4 (SDGs) emphasize social inclusion as a critical agenda for 2030, advocating strategies to enhance school preparedness for children with disabilities (Olusanya et al., 2023). However, achieving this vision is constrained by a persistent global shortage of special educators, especially those supporting children with emotional and behavioural challenges (Katsiyannis et al., 2003; Harper et al., 2022). These professionals, equipped with relevant education and specialised training, provide direct support to children with special needs (CWSN). However, they face disproportionately high attrition rates, 46% higher than general education teachers (Carver-Thomas et al., 2024), and nearly double those in mainstream settings (Sullivan & Skelcher, 2017). While retirement (18%) and involuntary exits (14%) are contributing factors, a significant majority (67%) of special educators leave the profession voluntarily, urging to address the underlying causes (Carver-Thomas et al., 2024).

The responsibilities of special educators are demanding and multifaceted, involving not only pedagogical instruction but also the management of behavioural and disability-specific challenges (Holzner & Gaunt, 2023; Olagunju et al., 2021). Their professional experiences often mirror those of helping professionals, with elevated levels of stress arising from continuous caregiving roles and exposure to students’ trauma (Koenig et al., 2017). Although prior research has explored various environmental factors, such as instructional approaches and student–teacher relationships (Kauffman et al., 2018; Nilsen, 2017), limited attention has been paid to individual factors, such as CF and satisfaction. This scoping review seeks to consolidate global research on the professional quality of life of special educators, drawing from diverse empirical investigations to offer a comprehensive synthesis.

Compassion fatigue (CF), originally conceptualised by Joinson (1992) in the context of nursing and later expanded by Figley (1995), refers to the physical, emotional, and psychological depletion resulting from sustained exposure to others’ trauma and suffering. As caregiving professionals, special educators are not immune to such experiences. Many enter the profession with deeply held aspirations of creating social impact, only to be confronted by persistent systemic inequities, abuse, and the trauma endured by their students. The resulting dissonance between professional ideals and lived realities can gradually erode their sense of efficacy and belief in their ability to make a difference (Gallant & Riley, 2014; Middleton et al., 2021). Numerous studies have documented elevated CF levels among this population (Hoffman et al., 2007; Holzner & Gaunt, 2023; Xu et al., 2023; Gupta, 2020; Koenig et al., 2018), further reinforcing the need for a focused review of their professional quality of life.

**Review Aim**

The aim of this scoping review is to identify and synthesize the existing body of literature on CF (CF) among special educators. By systematically mapping the current evidence, this review seeks to generate insights that can inform the development of effective, contextually grounded interventions. The review will be guided by the following research question:

What is currently known about CF among special educators?

**Methods**

**Protocol Registration**

To ensure transparency, this review protocol was prospectively registered on the Open Science Framework (OSF) on 24th July 2025. The registration is publicly accessible at [https://doi.org/10.17605/OSF.IO/CTHAB](https://doi.org/10.17605/OSF.IO/CTHAB" \t "_new). Data collection is planned to begin in July 2025 and will be completed by August 2025. Data analysis and manuscript preparation will be conducted between August and September 2025.This review will be conducted using the scoping review framework proposed by Arksey and O’Malley (2005), which provides a structured and systematic approach to mapping existing literature. This framework is particularly appropriate for broad research topics where the aim is to identify key concepts, clarify definitions, and explore gaps in the field. The review will also adhere to the PRISMA-ScR (Preferred Reporting Items for Systematic Reviews and Meta-Analyses Extension for Scoping Reviews) guidelines to ensure transparency and methodological rigour in reporting (Tricco et al., 2018). Arksey and O’Malley’s framework outlines five key stages, which will be followed in the conduct of this review:

***Stage I- Identifying the research question***

The review seeks to explore the scope and extent to which CF has been studied among special educators globally. The specific research questions guiding this review have been developed collaboratively by the authors (N.K. and A.R.N.) and are presented under the section titled *Review Aim.*

***Stage II- Searching for relevant studies***

A three-step search strategy, as recommended by the JBI (2020), will be employed to identify relevant literature. This includes:

1. An initial limited search of three databases (Scopus, Google Scholar, and PubMed) to identify relevant keywords and index terms,
2. A preliminary search using all identified keywords and index terms and
3. A manual search of the reference lists to identify additional eligible studies.

**Preliminary literature review**

To inform the development of inclusion and exclusion criteria, a preliminary literature search was conducted using three electronic databases: Google Scholar, PubMed, and Scopus. The initial search used the term “compassion fatigue” and was limited to studies published between 1995 and 2025. Additional filters included “compassion fatigue” to be included in the title and article published in English. This yielded 4,800 results on Google Scholar, 115 on PubMed, and 131 on Scopus. These databases were selected based on their relevance to the subject matter and their provision of open access to scholarly literature. Insights from this initial search informed the construction of the search string, the identification of relevant keywords and index terms, and the overall search strategy, which was later refined in consultation with an experienced librarian.

**Structured Search Strategy**

A systematic search will be conducted in four electronic databases: Google Scholar, PubMed, Scopus, and PsycINFO. The search will employ Boolean operators and a structured combination of keywords, including:

1. “compassion fatigue” OR “empathy fatigue” AND
2. “special educators” OR “special education teachers” OR “inclusive educators”.

The search will be limited to articles published between 1995 and 2025, as the concept of CF was first introduced in the scholarly literature by Figley in 1995. Only studies published in English will be included. A clearly defined set of inclusion and exclusion criteria will guide the screening and selection of eligible studies.

| Table 1. Search Strategy | |
| --- | --- |
| **Search strategy criteria** | **Search strategy** |
| Databases | Google Scholar, PubMed, Scopus & PsychNFO |
| Language | English |
| Articles dated between | 1995-Current |
| Geographic filter | None |
| Keywords | “compassion fatigue" OR "secondary traumatic stress" OR “burnout” OR  "compassion satisfaction" OR  "empathy fatigue" OR "vicarious trauma” AND “special educators" OR  "special education teachers" OR  "special needs teachers" OR "inclusive education teachers" OR  "special education professionals  “special education" OR "inclusive education" OR "disability education" OR  "special needs education"  “compassion fatigue" OR "secondary traumatic stress" OR burnout OR  "compassion satisfaction" OR  "empathy fatigue" OR "vicarious trauma"  AND  "special educators" OR "special education teachers" OR "special needs teachers" OR  "inclusive education teachers" OR "special education professionals"  AND  "special education" OR "inclusive education" OR "disability education" OR "special needs education")  "compassion fatigue" OR burnout |
| Inclusion Criteria | Population: The population of interest is special educators, who are trained professionals providing individualized educational support to children with special needs. |
| Concept: The key concept being studied is CF*.* |
| Context: The context of the study will be special education or inclusive education settings (special schools, inclusive schools, NGOs, etc) |
| Exclusion Criteria | Studies that don’t meet the standards of PCC framework |
| Studies published on CF in other populations |
| Studies published in languages other than English |
| PCC, Population, Concept, Context. | |

***Stage III- Selection of studies***

All citations identified through the structured search strategy will be collated and imported into Zotero reference management software, where duplicates will be removed. Titles and abstracts will then be independently screened by two reviewers to assess their relevance based on the predefined inclusion criteria. A list of excluded articles, along with documented reasons for exclusion will be maintained. Any disagreements between the two reviewers during the selection process will be resolved through discussion or, if necessary, by consulting a third reviewer. The study selection process will be reported using the PRISMA-ScR (Preferred Reporting Items for Systematic Reviews and Meta-Analyses Extension for Scoping Reviews) flow diagram (Tricco et al., 2018).

Although critical appraisal is not mandatory for scoping reviews, an assessment of the methodological quality of the included studies will be conducted in line with the Joanna Briggs Institute (JBI) methodology (Peters et al., 2020). The purpose of this appraisal is to gain insights into the methodological strengths and limitations of the included studies. It will not influence the inclusion or exclusion of studies but will support a more informed interpretation of the findings. Appraisal results will be summarized in both tabular and narrative formats.

**Inclusion Criteria**

The eligibility criteria for this review will be framed using the Population–Concept–Context (PCC) framework. The population of interest comprises of special educators or inclusive educators who provide support to children with physical and/or intellectual disabilities. The central concept that will be explored in this review is CF, which refers to the psychological distress, and decreased professional well-being as a consequence of sustained exposure to others' trauma or suffering. The context pertains specifically to special education or inclusive education settings. Accordingly, studies will be deemed eligible for inclusion if they focus explicitly on CF among special educators, published between 1995 and 2025, and available in the English language.

**Exclusion Criteria**

Studies will be excluded if they examine related but distinct constructs such as burnout or secondary traumatic stress in isolation, without situating them within the broader framework of CF. In addition, non-empirical works such as editorials, letters to the editor, commentaries, and opinion pieces will be excluded. Unpublished graduate theses or master's dissertations available in academic repositories will also be omitted. Finally, studies that address educators in general, without clearly identifying special educators as a distinct subgroup will also be excluded from the final selection.

***Stage IV-Data extraction***

Data extraction for this review will be carried out independently by the authors using a structured data charting process. The following information will be extracted from each included study: (a) title; (b) author(s) and year of publication; (c) characteristics of the study population; (d) study design and methodology; (e) assessment tools used; (f) any interventions reported; and (g) key findings. The extracted data will be systematically recorded using Microsoft Excel.

***Stage V-Collating, summarizing and reporting the results***

The final stage of the review will involve synthesising and reporting the findings in a structured and meaningful manner. The results will be presented in three steps: first, a summary of findings from quantitative studies; second, an overview of themes identified in qualitative investigations; and finally, a discussion of the broader implications of these findings for future research, educational policy, and professional practice. Descriptive summary tables will be provided to present key details from the included studies, offering readers a visual overview of the literature landscape. The overall reporting of the scoping review will be guided by the PRISMA-ScR checklist (Tricco et al., 2018), ensuring best-practice standards in evidence synthesis.

**Patient and public involvement**

There will be no patient or public involvement in the design, conduct, or reporting of this scoping review, as the study is based entirely on secondary data derived from previously published literature.

**Ethical considerations**

As the present scoping review does not involve human or animal participants, ethical clearance is not required. The data used in this review will be sourced exclusively from published, publicly available studies. Upon completion, the findings will be disseminated through submission to a peer-reviewed journal.

**Discussion**

***Potential Implications***

There is a consistently rising demand for qualified special educators to serve the needs of children with disabilities (CwDs), who represent a significant proportion of the global population (WHO, 2011; UNESCO, 2019). In the post-COVID-19 era, this demand has only intensified, with a notable increase in reported cases of developmental delays and neurodevelopmental disorders, further burdening educational and healthcare systems (UNICEF, 2022). Special educators often occupy multifaceted roles, not only as academic facilitators but also as emotional caregivers, and critical liaisons between students, families, and school systems. Unsurprisingly, the profession is marked by high attrition rates, often attributed to chronic stress, role strain, and emotional burnout (Billingsley, 2004; Sari, 2019). Although a growing body of research explores the work-related stressors that contribute to attrition, much of this work remains focused on environmental and institutional factors, such as lack of administrative support, inadequate pay, or overwhelming caseloads (Brunsting et al., 2014; Eddy et al., 2020). In contrast, personal factors such as CF, and satisfaction emerge as particularly salient yet underexplored constructs. Although extensively studied in healthcare and emergency professions (Figley, 1995; Bride, 2007), CF remains insufficiently examined in the context of special education. Preliminary searches conducted for this review indicate a disproportionate reliance on qualitative and case studies, with fewer quantitative or mixed-methods studies. Most existing literature treats CF in special educators as a peripheral concern.

The current scoping review aims to fill this critical gap by systematically identifying and synthesising all available literature on CF among special educators. To the best of the authors' knowledge, this will be one of the first comprehensive attempts to map the empirical inquiry on this topic globally. By doing so, the review will provide several important contributions. First, it will aid in estimating the prevalence of CF in special educators. Second, it will offer a synthesis of risk and protective factors of CF. Third, it will aid in understanding how demographic factors might influence the manifestation of CF. Fourth, it will consolidate data on measurement tools used to assess CF in this population. Finally, qualitative studies included in the review will offer rich thematic insights into the lived experiences of special educators, allowing for the identification of universal and context-specific patterns.

In addition to informing research, this review holds significant implications for practice and policy. A synthesis of evidence-based interventions, such as reflective supervision (Caringi et al., 2015), trauma-informed professional development (Stanley et al., 2018), and well-being initiatives (Nnubia et al., 2022), will guide schools, and administrative bodies in supporting educator mental health. These insights may be directly integrated into in-service training programs or adapted into pre-service curriculum modules that prioritise emotional preparedness for future special educators. At the policy level, the review advocates for the institutionalization of well-being frameworks within special education ecosystems. This may include the establishment of school-based mental health support, inclusion of self-care training, and the provision of wellness resources across all tiers of employment. Given the rising emotional toll of inclusive education, the need for policies that sustain the emotional labour of special educators is more urgent than ever. In sum, this scoping review is expected to serve as both a foundational reference and a strategic blueprint. It will not only map the current state of knowledge on CF among special educators but also guide future research direction for sustainable educational practice.

**Strengths and limitations**

One of the key strengths of this scoping review lies in its systematic and transparent methodological approach, guided by the Arksey and O’Malley framework and reported in accordance with PRISMA-ScR guidelines. The protocol has also been prospectively registered with the Open Science Framework (OSF), enhancing transparency and reproducibility. Additionally, all individual sources will be critically apprised for their quality of research using the JBI checklists. Another strength is the targeted focus on CF among special educators, a critically underexplored population. This specificity allows the review to consolidate fragmented evidence and expand the literature on educator well-being.

However, the review also has certain limitations. First, only studies published in English will be included, which may introduce language bias and lead to the exclusion of relevant non-English studies. Second, the review will be limited to published, peer-reviewed literature and will not include grey literature such as dissertations or unpublished reports, which may contain additional insights. Despite these limitations, this scoping review will serve as a valuable starting point for future empirical work by mapping the current findings and identifying key gaps in knowledge.

**Acknowledgements**

I sincerely thank Ms. Malini Roy, Ph.D. Research Scholar at VIT-AP University, for her insightful reviews that strengthened this work.

**Author contributions**

N.K. conceptualized the scoping review protocol and prepared the initial draft of the manuscript under the supervision of A.R.N. Both N.K. and A.R.N. critically reviewed the content, developed the research questions and objectives, and collaboratively defined the detailed methodology. All authors reviewed and approved the final version of the manuscript.

**Funding**

No funding was received for the development of this scoping review protocol.

**Conflict of Interest**

The authors declare no conflicts of interest in the preparation of this review protocol.

**References**

Peters, M. D. J., Godfrey, C. M., McInerney, P., Munn, Z., Tricco, A. C., & Khalil, H. (2020). Chapter 11: Scoping Reviews (2020 version). In E. Aromataris & Z. Munn (Eds.), *JBI Manual for Evidence Synthesis*. JBI. https://doi.org/10.46658/JBIMES-20-12

Joanna Briggs Institute. (2020). *JBI Critical Appraisal Tools.* Retrieved from https://jbi.global/critical-appraisal-tools

World Health Organization. (2000). *World Health Organization–WHO.*

Olusanya, B. O., Kancherla, V., Shaheen, A., Ogbo, F. A., & Davis, A. C. (2022). Global and regional prevalence of disabilities among children and adolescents: analysis of findings from global health databases. *Frontiers in public health, 10*, 977453.

Olusanya, B. O., Davis, A. C., Wertlieb, D., Boo, N. Y., Nair, M. K. C., Halpern, R., ... & Kassebaum, N. J. (2018). Developmental disabilities among children younger than 5 years in 195 countries and territories, 1990–2016: a systematic analysis for the Global Burden of Disease Study 2016. *The Lancet Global Health, 6*(10), e1100-e1121.

Katsiyannis, A., Zhang, D., & Conroy, M. A. (2003). Availability of special education teachers: Trends and issues. *Remedial and special education, 24*(4), 246-253.

Harper, J., Gilmour, A. F., & Galea, N. (2023). Trends in the potential supply of new special educators. *Exceptionality, 31*(4), 258-274.

Carver-Thomas, D., Bianco, M., Goings, R., & Hyler, M. E. (2024). Policies and Practices for Recruiting and Retaining Teachers of Color. *Education Policy Analysis Archives, 32*(59), n59.

Sullivan, H., & Skelcher, C. (2017). Working across boundaries: Collaboration in public services. Bloomsbury Publishing.

Olagunju, A. T., Akinola, M. A., Fadipe, B., Jagun, O. O., Olagunju, T. O., Akinola, O. O., & Chaimowitz, G. A. (2021). Psychosocial wellbeing of Nigerian teachers in special education schools. Journal of Autism and Developmental Disorders, 51, 1131–1141. https://doi.org/10.1007/s10803-020-04583-3

Holzner, K. L., & Gaunt, L. (2023). Wellbeing promotion in Tasmanian schools: Have we forgotten support teachers? Australasian Journal of Special and Inclusive Education, 47(2), 96–109. https://doi.org/10.1017/jsi.2023.9

Koenig, A., Rodger, S., & Specht, J. (2018). Educator burnout and compassion fatigue: A pilot study. Canadian Journal of School Psychology, 33(4), 259–278. https://doi.org/10.1177/0829573516685017

Kauffman, J. M., Hallahan, D. P., Pullen, P. C., & Badar, J. (2018). Special education: What it is and why we need it (2nd ed.). Routledge.

Nilsen, S. (2017). Special education and general education—Coordinated or separated? A study of curriculum planning for pupils with special educational needs. International Journal of Inclusive Education, 21(2), 205–217. <https://doi.org/10.1080/13603116.2016.1197323>

Joinson, C. (1992). Coping with compassion fatigue. Nursing, 22(4), 116–119.

Figley, C. R. (1995). Compassion fatigue: Coping with secondary traumatic stress disorder in those who treat the traumatized. Brunner-Routledge.

Gallant, A., & Riley, P. (2014). Early career teacher attrition: New thoughts on an intractable problem. Teacher Development, 18(4), 562–580. https://doi.org/10.1080/13664530.2014.945129

Middleton, T., & Kay, L. (2021). Uncharted territory and extraordinary times: The SENCo's experiences of leading special education during a pandemic in England. British Journal of Special Education, 48(2), 212–234. https://doi.org/10.1111/1467-8578.12340

Hoffman, S., Palladino, J. M., & Barnett, J. (2007). Compassion fatigue as a theoretical framework to help understand burnout among special education teachers. Online Submission, 2(1), 15–22.

Gupta, S. S. (2020). Voices from the field: Why aren’t we talking about teacher well-being with inclusion?. *Young Exceptional Children, 23*(2), 59-62.

Xu, N., Chen, P., Lang, R., Kong, L. L., & Qu, H. Y. (2023). The effect of Chinese special education teachers’ competence on their occupational well-being: The mediating effect of resilience. International Journal of Disability, Development and Education, 70(6), 1206–1221. https://doi.org/10.1080/1034912X.2021.2009150

Arksey, H., & O'Malley, L. (2005). Scoping studies: Towards a methodological framework. International Journal of Social Research Methodology, 8(1), 19–32. https://doi.org/10.1080/1364557032000119616

Tricco, A. C., Lillie, E., Zarin, W., O'Brien, K. K., Colquhoun, H., Levac, D., Moher, D., Peters, M. D., Horsley, T., Weeks, L., Hempel, S., Akl, E. A., Chang, C., McGowan, J., Stewart, L., Hartling, L., Aldcroft, A., Wilson, M. G., Garritty, C., ... & Straus, S. E. (2018). PRISMA extension for scoping reviews (PRISMA-ScR): Checklist and explanation. Annals of Internal Medicine, 169(7), 467–473. https://doi.org/10.7326/M18-0850

Peters, M. D., Marnie, C., Tricco, A. C., Pollock, D., Munn, Z., Alexander, L., ... & Khalil, H. (2020). Updated methodological guidance for the conduct of scoping reviews. *JBI evidence synthesis, 18*(10), 2119-2126.

World Health Organization. (2011). World report on disability. In *World report on disability* (pp. 24-24).

Berman-Bieler, R., Petroni, S., Abdi, O., & Wijesekera, S. (2023). UNICEF: a model for disability-inclusive policy and strategy. *The Lancet Child & Adolescent Health*, *7*(4), 226–228. https://doi.org/10.1016/s2352-4642(22)00255-3

UNICEF. (2022). Prospects for Children in 2022.

Billingsley, B. S. (2004). Special education teacher retention and attrition: A critical analysis of the research literature. *The journal of special education*, *38*(1), 39-55.

Sari, Z. P., Sarofah, R., & Fadli, Y. (2022). The implementation of inclusive education in Indonesia: Challenges and achievements. *Jurnal Public Policy*, *8*(4), 264-269.

Brunsting, N. C., Sreckovic, M. A., & Lane, K. L. (2014). Special education teacher burnout: A synthesis of research from 1979 to 2013. Education and Treatment of Children, 37(4), 681–711. https://doi.org/10.1353/etc.2014.0032

Eddy, C. L., Huang, F. L., Cohen, D. R., Baker, K. M., Edwards, K. D., Herman, K. C., & Reinke, W. M. (2020). Does teacher emotional exhaustion and efficacy predict student discipline sanctions? School Psychology Review, 49(3), 239–255. https://doi.org/10.1080/2372966X.2020.1728663

Bride, B. E., Radey, M., & Figley, C. R. (2007). Measuring compassion fatigue. *Clinical social work journal*, *35*(3), 155-163.Caringi, J. C., Stanick, C., Trautman, A., Crosby, L., Devlin, M., & Adams, S. (2015). Secondary traumatic stress in public school teachers: Contributing and mitigating factors. Advances in School Mental Health Promotion, 8(4), 244–256. https://doi.org/10.1080/1754730X.2015.1080123

Stanley, S., & Sebastine, A. J. (2024). Predictors of compassion fatigue and compassion satisfaction in social workers: A quantitative study from India. Human Services Organizations: Management, Leadership & Governance, 48(5), 540–554. https://doi.org/10.1080/23303131.2024.2319210

Nnubia, U. I., Nwobi, C. A., FO, O. F. O., & Eke, B. A. (2022). Assessment of compassion fatigue and psychological well-being of special needs children’s educators in Enugu State. Journal for Family & Society Research, 1(2).
