# Supplementary material
Source: Research Square preprint supplement (doi:10.21203/rs.3.rs-9828682/v1)
Supplement: Supplementary file 3 [file ef1833e67ac9b7c749463998.docx]

*S 5.* Critical appraisal of analytical cross-sectional studies

| Author(s), year | Study ID | Joanna Briggs Institute Checklist Questions for Analytical Cross-Sectional Studies | | | | | | | | Score |
| --- | --- | --- | --- | --- | --- | --- | --- | --- | --- | --- |
| Were the criteria for inclusion in the sample clearly defined? | Were the study subjects and the setting described in detail? | Was the exposure measured in a valid and reliable way? | Were objective, standard criteria used for measurement of the condition? | Were confounding factors identified? | Were strategies to deal with confounding factors stated? | Were the outcomes measured in a valid and reliable way? | Was appropriate statistical analysis used? |
| (Artiola, 2025) | 001 | YES | NO | YES | YES | YES | NO | YES | YES | 6/8 |
| (Esomonu et al., 2025) | 002 | YES | YES | YES | YES | YES | NO | YES | YES | 7/8 |
| (Ghaffar & Amjad, 2025) | 003 | YES | NO | YES | YES | YES | NO | YES | YES | 6/8 |
| (Covington, 2025) | 004 | YES | NO | YES | YES | YES | NO | YES | YES | 6/8 |
| (Chen et al., 2023) | 005 | YES | YES | YES | YES | YES | NO | YES | YES | 7/8 |
| Ondrejková and Halamová (2022) | 006 | YES | NO | YES | YES | YES | NO | YES | YES | 6/8 |
| Levkovich and Ricon (2020) | 007 | YES | NO | YES | YES | YES | NO | YES | YES | 6/8 |
| Fleckman et al. (2022) | 008 | YES | NO | YES | YES | YES | NO | YES | YES | 6/8 |
| Hupe and Stevenson (2019) | 009 | YES | NO | YES | YES | YES | NO | YES | YES | 6/8 |
| Fu et al., 2020 | 010 | YES | YES | YES | YES | YES | NO | YES | YES | 7/8 |
| (De Stasio et al., 2017 | 011 | YES | YES | YES | YES | YES | NO | YES | YES | 7/8 |
| Olagunju et al. (2020) | 012 | YES | YES | YES | YES | YES | NO | YES | YES | 7/8 |
| Ervasti et al. (2011) | 013 | YES | NO | YES | YES | YES | NO | YES | YES | 6/8 |
| Steen (2019) | 014 | YES | YES | YES | YES | YES | NO | YES | YES | 7/8 |
| Sutjiono et al. (2020) | 015 | YES | YES | YES | YES | YES | NO | YES | YES | 7/8 |
| Darawsheh et al. (2023) | 016 | YES | NO | YES | YES | YES | NO | YES | YES | 6/8 |
| Foteini et al. (2020) | 017 | YES | YES | YES | YES | YES | NO | YES | YES | 7/8 |
| Bozgeyikli (2018) | 018 | YES | YES | YES | YES | YES | NO | YES | YES | 7/8 |
| Vang et al. (2022) | 019 | YES | NO | YES | YES | YES | NO | YES | YES | 6/8 |
| Holding et al. (2024) | 020 | YES | YES | YES | YES | YES | NO | YES | YES | 7/8 |
| Kendrick et al. (2025) | 021 | YES | YES | YES | YES | YES | NO | YES | YES | 7/8 |
| Kendrick (2022) | 022 | YES | YES | YES | YES | YES | NO | YES | YES | 7/8 |
| Donahoo et al. (2017) | 023 | YES | YES | YES | YES | YES | NO | YES | YES | 7/8 |
| Pérez-Chacón et al. (2021) | 024 | YES | YES | YES | YES | YES | NO | YES | YES | 7/8 |
| (Conrad & Kellar-Guenther, 2006) | 025 | YES | NO | YES | YES | YES | NO | YES | YES | 6/8 |
| Nnubia et al. (2022) | 026 | YES | YES | YES | YES | YES | NO | YES | YES | 7/8 |

*S 6.* Critical appraisal for qualitative research

| Author(s),  year | Study ID | Joanna Briggs Institute Checklist Questions for Qualitative Research | | | | | | | | | | Score |
| --- | --- | --- | --- | --- | --- | --- | --- | --- | --- | --- | --- | --- |
| Is there congruity between the stated philosophical perspective and the research methodology? | Is there congruity between the research methodology and the research question or objectives? | Is there congruity between the research methodology and the methods used to collect data? | Is there congruity between the research methodology and the representation and analysis of data? | Is there congruity, between the research methodology and the interpretation of results? | Is there a statement locating the researcher culturally or theoretically? | Is the influence of the researcher on the research, and vice-versa, addressed? | Are participants, and their voices, adequately represented? | Is the research ethical according to current criteria or, for recent studies, and is there evidence of ethical approval by an appropriate body? | Do the conclusions drawing in the research report flow from the analysis, or interpretation, of the data? |
| Kanmani 2022 | 001 | YES | YES | YES | YES | YES | NO | NO | YES | YES | YES | 8/10 |
| Sawatske 2024 | 002 | YES | YES | YES | YES | YES | NO | NO | NO | YES | YES | 7/10 |
| Paterson 2021 | 003 | YES | YES | YES | YES | YES | NO | NO | NO | YES | YES | 7/10 |
| Ziaian-Ghafari 2019 | 004 | YES | YES | YES | YES | YES | YES | NO | YES | YES | YES | 9/10 |
| Tepper 2007 | 005 | YES | YES | YES | YES | YES | NO | NO | YES | YES | YES | 8/10 |
| Davis 2011 | 006 | YES | YES | YES | YES | YES | NO | NO | YES | YES | YES | 8/10 |
| Oberg 2023 | 007 | YES | YES | YES | YES | YES | NO | NO | NO | YES | YES | 7/10 |
| Geoffrion 2016 | 008 | YES | YES | YES | YES | YES | NO | NO | NO | YES | YES | 7/10 |
| Hoffman 2007 | 009 | YES | YES | YES | YES | YES | NO | NO | NO | YES | YES | 7/10 |

**REFERENCES (APA 7th ed.)**

1. Artiola, A. (2025). Compassion Fatigue, Burnout, and Secondary Traumatic Stress Among Filipino School Counselors. Psychology and Education: A Multidisciplinary Journal, 40(7), 1-1.
2. Ezenwosu, Ngozi Elizabeth, Nkechi Patricia-Mary Esomonu, Adeline Nne Anyanwu, and Kingsley Ekene Emesi. “Examining the Issue of Teachers’ Compassion in Teaching People With Disabilities (PWDs) in the Regular Classroom.” *International Journal of Research and Innovation in Social Science* IX, no. IIIS (January 1, 2025): 2537–49. https://doi.org/10.47772/ijriss.2025.903sedu0196.
3. Ghaffar, M., & Amjad, M. (2025). COMPASSION FATIGUE, EMOTIONAL REGULATION, AND FRUSTRATION TOLERANCE IN THE THERAPISTS WORKING WITH SPECIAL NEEDS CHILDREN. International Journal of Social Sciences Bulletin, 3(8), 854-865.
4. Covington, S. K. (2025). A Predictive Correlational Study of Compassion Fatigue, Compassion Satisfaction and Emotional Exhaustion Among K-12 Educators.
5. Chen, C. C. (2020). Professional Quality of Life among Occupational Therapy Practitioners: An Exploratory Study of Compassion Fatigue. *Occupational Therapy in Mental Health*, *36*(2), 162–175. https://doi.org/10.1080/0164212x.2020.1725713
6. Chen, F., Ge, Y., Xu, W., Yu, J., Zhang, Y., Xu, X., & Zhang, S. (2023). Changing kindergarten teachers’ mindsets toward children to overcome compassion fatigue. Psychology research and behavior management, 521-533.
7. Levkovich, I., & Ricon, T. (2020). Understanding compassion fatigue, optimism and emotional distress among Israeli school counsellors. Asia Pacific Journal of Counselling and Psychotherapy, 11(2), 159-180.
8. Fleckman, J. M., Petrovic, L., Simon, K., Peele, H., Baker, C. N., Overstreet, S., & New Orleans Trauma-Informed Schools Learning Collaborative. (2022). Compassion satisfaction, secondary traumatic stress, and burnout: A mixed methods analysis in a sample of public-school educators working in marginalized communities. School Mental Health, 14(4), 933-950.
9. Hupe, T. M., & Stevenson, M. C. (2019). Teachers’ intentions to report suspected child abuse: The influence of compassion fatigue. *Journal of Child Custody*, *16*(4), 364-386.
10. Fu, W., Pan, Q., Zhang, C., & Cheng, L. (2022). Influencing factors of Chinese special education teacher turnover intention: Understanding the roles of subject well-being, social support, and work engagement. *International Journal of Developmental Disabilities*, *68*(3), 342-353.
11. De Stasio, S., Fiorilli, C., Benevene, P., Uusitalo‐Malmivaara, L., & Chiacchio, C. D. (2017). Burnout in special needs teachers at kindergarten and primary school: Investigating the role of personal resources and work wellbeing. Psychology in the Schools, 54(5), 472-486.
12. Olagunju, A. T., Akinola, M. A., Fadipe, B., Jagun, O. O., Olagunju, T. O., Akinola, O. O., ... & Chaimowitz, G. A. (2021). Psychosocial wellbeing of Nigerian teachers in special education schools. Journal of Autism and Developmental Disorders, 51(4), 1131-1141.
13. Ervasti, J., Kivimäki, M., Pentti, J., Suominen, S., Vahtera, J., & Virtanen, M. (2011). Sickness absence among Finnish special and general education teachers. Occupational Medicine, 61(7), 465-471.
14. Steen, A. M. (2019). Threats to teaching: An investigation into the constructs of compassion fatigue in the classroom. University of South Florida.
15. Sutjiono, B., Mar’at, S., & Risnawaty, W. (2020, May). Psychometric evaluation professional quality of life in special education teachers. In Tarumanagara International Conference on the Applications of Social Sciences and Humanities (TICASH 2019) (pp. 715-722). Atlantis Press.
16. Darawsheh, S. R., Asha, I. K. K., AbuSaif, R., Alhejoj, A. F., & Khasawneh, M. A. S. (2023). An Outline of the Professional Quality of Teachers who Teach Children with Special Needs. Journal of Education and E-learning Research, 10(3), 358-363.
17. Foteini, C., Dimitrios, S., Harilaos, Z., Victoria, Z., & Vasiliki, G. (2020). Professional quality of life of special education teachers in Greece. European Journal of Special Education Research.
18. Bozgeyikli, H. (2018). Psychological Needs as the Working-Life Quality Predictor of Special Education Teachers. Universal Journal of Educational Research, 6(2), 289-295.
19. Vang, M. L., Pihl‐Thingvad, J., & Shevlin, M. (2022). Identifying child protection workers at risk for secondary traumatization: A latent class analysis of the Professional Quality of Life Scale–5. Journal of traumatic stress, 35(6), 1608-1619.
20. Holding, M. A., Parkinson, L., & Taylor, D. (2024). Work stress and professional quality of life in disability support workers: The mediating role of psychological flexibility. Journal of intellectual & developmental disability, 49(4), 425-437.
21. Kendrick, A. H., Tay, M. K., & Shahin, M. J. H. (2025, January). Three year quantitative study of compassion satisfaction and fatigue among teachers and educational workers in Alberta, Canada. In Healthcare (Vol. 13, No. 3, p. 226). MDPI.
22. Kendrick, A. (2022). Compassion fatigue, burnout, and the emotional labor of educational workers. The International Journal of Health, Wellness and Society, 13(1), 31.
23. Sharp Donahoo, L. M., Siegrist, B., & Garrett-Wright, D. (2018). Addressing compassion fatigue and stress of special education teachers and professional staff using mindfulness and prayer. The Journal of School Nursing, 34(6), 442-448.
24. Pérez-Chacón, M., Chacón, A., Borda-Mas, M., & Avargues-Navarro, M. L. (2021). Sensory processing sensitivity and compassion satisfaction as risk/protective factors from burnout and compassion fatigue in healthcare and education professionals. International journal of environmental research and public health, 18(2), 611.
25. Conrad, D., & Kellar-Guenther, Y. (2006). Compassion fatigue, burnout, and compassion satisfaction among Colorado child protection workers. Child abuse & neglect, 30(10), 1071-1080.
26. Nnubia, U. I., Nwobi, C. A., FO, O. F. O., & Eke, B. A. (2022). Assessment of Compassion Fatigue and Psychological Well-Being of Special Needs Children’s Educators in Enugu State. Journal For Family & Society Research, 1(2).
27. Kanmani, D. S., & Sujathamalini, D. J. (2022). *A CASE STUDY ON COMPASSION FATIGUE AMONG TEACHERS HANDLING STUDENT WITH DISRUPTIVE BEHAVIOURS IN INCLUSIVE CLASSROOM*. IMSEAR. <https://pesquisa.bvsalud.org/portal/resource/pt/sea-221128>
28. Sawatske, A., Leonard, C., Harris, J., & Dally, K. (2024). The case for special education teacher wellbeing: A multidimensional review of the evidence and future directions. Australasian Journal of Special and Inclusive Education, 48(1), 64-77.
29. Paterson, B., Taylor, J., & Young, J. (2021). Compassion Fatigue and Behaviours that Challenge in the Classroom. Scottish Educational Review, 53(1), 26–41. [https://doi.org/10.1163/27730840-05301003](https://doi.org/10.1163/27730840-05301003" \t "_blank)
30. Ziaian-Ghafari, N., & Berg, D. H. (2019). Compassion fatigue: The experiences of teachers working with students with exceptionalities. Exceptionality Education International, 29(1), 32-53.
31. Tepper, E. L., & Palladino, J. M. (2007). Compassion Fatigue and Burnout: Precursors to Elementary Special Educators' Exodus from Teaching. Online Submission.
32. Davis, K. C., & Palladino, J. M. (2011). Compassion Fatigue among Secondary Special Education Teachers: A Case Study about Job Stress and Burnout. Online Submission.
33. Oberg, G., Carroll, A., & Macmahon, S. (2023, March). Compassion fatigue and secondary traumatic stress in teachers: How they contribute to burnout and how they are related to trauma-awareness. In Frontiers in Education (Vol. 8, p. 1128618). Frontiers Media SA.
34. Geoffrion, S., Morselli, C., & Guay, S. (2016). Rethinking compassion fatigue through the lens of professional identity: The case of child-protection workers. Trauma, Violence, & Abuse, 17(3), 270-283.
35. Hoffman, S., Palladino, J. M., & Barnett, J. (2007). Compassion Fatigue as a Theoretical Framework to Help Understand Burnout among Special Education Teachers. Online Submission, 2(1), 15-22.
