# Supplementary material
Source: Research Square preprint supplement (doi:10.21203/rs.3.rs-9828682/v1)
Supplement: Supplementary file 4 [file f3825abfa0932fb1931087d2.docx]

**Supplementary**

*S 1.* Geographical distribution of included studies in review

| Study ID | America | | |
| --- | --- | --- | --- |
| 001 | Predictive Correlational Study of Compassion Fatigue, Compassion Satisfaction and Emotional Exhaustion Among K-12 Educators | (Covington, 2025) | United States |
| 002 | Compassion Satisfaction, Secondary Traumatic Stress, and Burnout:  A Mixed Methods Analysis in a Sample of Public‑School Educators Working in Marginalized Communities | Fleckman et al. (2022) | United States |
| 003 | Teachers’ intentions to report suspected child abuse: the influence of compassion fatigue | Hupe and Stevenson (2019) | United States |
| 004 | Threats to Teaching: An Investigation Into the Constructs of Compassion Fatigue in the Classroom | Steen (2019) | United States |
| 005 | Compassion fatigue, burnout, and compassion satisfaction  among Colorado child protection workers | Holding 2024 | United States |
| 006 | Addressing Compassion Fatigue and Stress of Special Education Teachers and Professional Staff Using Mindfulness and Prayer | Donahoo et al. (2018) | Rural Western Kentucky, USA |
| 007 | Three Year Quantitative Study of Compassion Satisfaction and Fatigue Among Teachers and Educational Workers in Alberta, Canada | Kendrick et al. (2025) | Canada |
| 008 | Compassion Fatigue, Burnout, and the Emotional Labor of Educational Workers | Kendrick (2022) | Canada |
| Europe | | | |
| 001 | Prevalence of compassion fatigue among helping professions and relationship to compassion for others, self-compassion and self-criticism | Ondrejková and Halamová (2022) | Central Europe (primarily Slovakia, Czech Republic, Hungary, Roma, Moldovan, Ruthenian, Polish participants). |
| 002 | Burnout in Special Needs Teachers at Kindergarten and Primary School: Investigating the Role of Personal Resources and Work Wellbeing | (De Stasio et al., 2017 | Other: Italy (Central region – Rome) |
| 003 | Sickness absence among Finnish special and general education teachers | Ervasti et al. (2011) | Other: Finland |
| 004 | PROFESSIONAL QUALITY OF LIFE OF SPECIAL EDUCATION TEACHERS IN GREECE | Foteini et al. (2020) | Other: Greece |
| 005 | Identifying child protection workers at risk for secondary traumatization: A latent class analysis of the Professional Quality of Life Scale–5 | Vang et al. (2022) | Other: Denmark |
| 006 | Sensory Processing Sensitivity and Compassion Satisfaction as  Risk/Protective Factors from Burnout and Compassion Fatigue | Pérez-Chacón et al. (2021) | Other: Spain |
| Africa | | | |
| 001 | Examining the Issue of Teachers’ Compassion in Teaching People with Disabilities (PWDs) in the Regular Classroom | (Ezenwosu et al., 2025) | Anambra State, Nigeria |
| 002 | Psychosocial Wellbeing of Nigerian Teachers in Special Education  Schools | Olagunju et al. (2021) | Other: Ogun State, South-West Nigeria |
| 003 | Assessment of Compassion Fatigue and Psychological Well-Being of Special Needs Children’s Educators in Enugu State | Nnubia et al. (2022) | Enugu State, Nigeria |
| Eastern Mediterranean Region | | | |
| 001 | COMPASSION FATIGUE, EMOTIONAL REGULATION, AND FRUSTRATION TOLERANCE IN THE THERAPISTS WORKING WITH SPECIAL NEEDS CHILDREN | (Ghaffar & Amjad, 2025) | Other: Lahore, Pakistan |
| 002 | Psychological Needs as the Working-Life Quality  Predictor of Special Education Teachers | Bozgeyikli (2018) | Other: Turkey |
| 003 | Understanding compassion fatigue, optimism and emotional distress among Israeli school counsellors | Levkovich and Ricon (2020) | Other: Israel |
| 004 | An outline of the professional quality of teachers who teach children with special needs | Darawsheh et al. (2023) | Other: Saudi Arabia |
| South-East Asia | | | |
| 001 | Psychometric Evaluation Professional Quality of Life in Special Education Teachers | Sutjiono et al. (2020) | Other: Jakarta, Indonesia. |
| 002 | Compassion Fatigue, Burnout, and Secondary Traumatic Stress Among Filipino School Counselors | (Artiola, 2025) | Philippines |
| Western Pacific | | | |
| 001 | Changing Kindergarten Teachers’ Mindsets Toward  Children to Overcome Compassion Fatigue | (Chen et al., 2023) | China |
| 002 | Influencing factors of Chinese special education  teacher turnover intention: understanding the  roles of subject well-being, social support, and  work engagement | Fu et al., 2022 | Other: Mainland China (five provinces) |
| 003 | Work stress and professional quality of life in  disability support workers: The mediating role of  psychological flexibility | Holding et al. (2024) | Australia |

S 2. Quantitative Findings

| Study ID | Citation | Key Quantitative findings |
| --- | --- | --- |
| 001 | (Artiola, 2025) | Most participants reported moderate burnout (76%), while 14% showed high burnout and 78% experienced high secondary traumatic stress (STS). Burnout was significantly higher among registered counsellors and those managing larger caseloads, while public-sector counsellors reported greater STS. Years of experience showed no significant effect. Qualitative findings identified two themes: primary traumatic experiences (e.g., threats, humiliation, supervisory reprimand) and secondary exposure through clients’ trauma. |
| 002 | (Ezenwosu et al., 2025) | Lower levels of self-compassion, compassion for others, and perceived compassion were weak but significant predictors of engagement in disability-related teaching (Adjusted R² = .075). Self-compassion emerged as the strongest individual predictor (β = –.137), though overall effect sizes remained modest. |
| 003 | (Ghaffar & Amjad, 2025) | Burnout and STS were strongly interrelated and significantly predicted emotional dysregulation, which in turn predicted discomfort intolerance, entitlement, emotional intolerance, and achievement difficulties. Mediation effects were significant across all models, which demonstrated good fit and high reliability. |
| 004 | (Covington, 2025) | Participants reported moderate emotional exhaustion and compassion fatigue, alongside high compassion satisfaction. Regression analysis explained 64.5% of variance in emotional exhaustion, with compassion fatigue as the strongest predictor (β = .623), while compassion satisfaction showed a protective effect (β = –.250). |
| 005 | (Chen et al., 2023) | Positive mindsets toward children were associated with higher empathy motivation and social support, and lower compassion fatigue. Empathy motivation partially mediated this relationship, while job stress and social support moderated effects on empathy but not directly on fatigue. |
| 006 | Ondrejková and Halamová (2022) | Burnout was significantly higher among home nurses, doctors, social workers, psychologists, and pedagogues compared to psychotherapists, while doctors showed lower compassion satisfaction. Compassion fatigue (CF) was unrelated to years of experience but increased with weekly client-contact hours, particularly beyond 36 hours. Medium CF was associated with lower compassion and self-compassion, and higher self-criticism. CF correlated strongly with burnout (rs = .894) and STS (rs = .905), and moderately negatively with compassion satisfaction. The model explained 43.8% of CF variance, with profession exerting indirect effects via self-criticism and self-compassion. |
| 007 | Levkovich and Ricon (2020) | Participants reported moderate compassion fatigue and burnout, low STS, and high compassion satisfaction. Perceived stress was positively associated with emotional distress, burnout, CF, and STS, while optimism showed inverse relationships and positive associations with compassion satisfaction. No age or seniority differences emerged. High-school counselors exhibited higher CF and STS than elementary counselors, with perceived stress mediating the link between CF and emotional distress. |
| 008 | Fleckman et al. (2022) | Elevated STS (14–16%) and burnout (9–15%) were observed, with approximately one-quarter reporting high distress. Educators experienced intrusive thoughts, emotional exhaustion, anxiety, sleep disturbance, and functional impairments, alongside positive experiences of meaning, growth, and professional fulfilment. Mixed-methods findings indicated that ProQOL inadequately captured educator-specific emotional well-being, with emotional distress emerging as a distinct construct shaped by relational and contextual stressors. |
| 009 | Hupe and Stevenson (2019) | Although many teachers suspected child abuse, reporting intentions remained low (20–53%), with high indecision (27–44%). Compassion fatigue was linked to negative reporting attitudes, psychological detachment, and job cynicism, with these variables mediating the association. Perceived knowledge predicted reporting intentions more consistently than legal awareness. |
| 010 | Fu et al., 2022 | Approximately 24% of teachers reported turnover intentions. Subject well-being and social support were negatively associated with turnover and positively with work engagement, which partially mediated these relationships. Female gender and greater teaching experience predicted lower turnover intention. |
| 011 | (De Stasio et al., 2017) | Strongest burnout predictors: teacher happiness (β = –.40) and self-esteem (β = –.24); job satisfaction also reduced personal burnout. Age positively predicted burnout. Student-related burnout negatively predicted by self-efficacy, self-esteem, happiness, and job satisfaction; age showed positive association. |
| 012 | Olagunju et al. (2021) | Psychological distress was present in 38.2% of teachers.  Caregiver/teacher burden was high in 51.5% of participants.  Burden and distress showed a moderate positive correlation (rs = 0.384). Burden was positively related to anxiety–depression (rs = 0.303) and social dysfunction (rs = 0.33). High burden and few years of teaching experience were key predictors of psychological distress. |
| 013 | Ervasti et al. (2011) | Sickness absence rates: Short-term: 1.1 spells per person-year. Long-term: 0.4 spells per person-year. Women reported higher short-term (RR = 1.33) and long-term (RR = 1.40) sickness absence than men. Special educators had slightly higher short-term (RR = 1.15) and long-term (RR = 1.20) absence than general educators. |
| 014 | Steen (2019) | Both general and special teachers scored high on burnout and compassion fatigue; compassion satisfaction moderate–high. Compassion satisfaction negatively correlated with burnout, STS, and distress. MANOVA showed no effects of role, gender, or experience. |
| 015 | Sutjiono et al. (2020) | ProQOL reliability α = .70–.79; CVI > .90. CS positively correlated with life satisfaction; burnout and STS positively with depression, anxiety, stress. CFA yielded revised 22-item model. Burnout differed by age; STS by experience. |
| 016 | Darawsheh et al. (2023) | - Majority of teachers reported moderate CS and CF.  - 77% had Medium-High burnout; 72% had Medium-High STS.  - Teaching duration significantly associated with STS.  - Income satisfaction significantly associated with CS.  - Empathy and student behavior linked to CF/STS" |
| 017 | Foteini et al. (2020) | ProQOL Levels: Job satisfaction: High, Secondary traumatic stress: Low, Burnout: Low  Special educators showed higher job satisfaction, while non-specialized teachers had higher STS and burnout.  Younger and less experienced teachers reported more burnout.  Gender, marital status, and grade level showed no meaningful differences.  Job satisfaction was negatively correlated with STS. STS and burnout showed a strong positive relationship. Job satisfaction and burnout were not related. |
| 018 | Bozgeyikli (2018) | Psychological needs predicted 18.9% CS variance (autonomy β = –.269; dominance β = –.169), 37.2% burnout (autonomy β = .311; dominance β = .259), and 35.1% CF (relationship β = .457). |
| 019 | Vang et al. (2022) | Three latent classes identified via LCA:  1. Secondary traumatization (3.8%, n = 21) – high symptom endorsement  2. Prodromal (28.6%, n = 140) – moderate risk, overinvolvement/hypervigilance  3. Low risk (67.5%, n = 384) – low symptom endorsement |
| 020 | Holding et al. (2024) | High burnout 25.9%, CF 24.7%, low CS 27.1%. Work stress correlated with burnout (r = .57), CF (r = .49), CS (r = –.28), and flexibility (r = –.36). Psychological flexibility correlated negatively with burnout (r = –.56), CF (r = –.57), and positively with CS (r = .36); mediated stress–ProQOL links. |
| 021 | Kendrick et al. (2025) | Teachers (N = 4,332): High CS declined (11.3% → 6.3%); high CF increased (13.6% → 22.7%) from 2020–2023. Mid-career teachers (11–15 yrs) showed highest CF; early (0–5 yrs) and late career (21+ yrs) showed lower CS and CF. Administrators (N = 1,331): CF increased (M = 27.9 → 30.05); mid–late career (11–20 yrs) highest CF. Exhaustion and low energy increased across groups (>90% by Year 3). Years of service predicted CS and CF (R² < 3%). |
| 022 | Kendrick (2022) | Educational workers perform significant emotional labor daily, often without formal training.  They provide crisis and trauma support to students and colleagues, leading to elevated burnout and compassion fatigue.  Quantitative data indicate high levels of occupational distress: 54.3% experience compassion stress/fatigue; 90% report burnout symptoms. |
| 023 | Donahoo et al. (2018) | High-frequency mindfulness reduced stress (PSS: 13.35 vs. 17.92, p = .04). Combined mindfulness + prayer increased CS (40.5 vs. 33.7, p = .029) and reduced stress (13.5 vs. 20.3, p = .024). Burnout increased pre–post (24.07 → 32.74, p < .001). No effects for STS, reminders, or support groups. |
| 024 | Pérez-Chacón et al. (2021) | Burnout was low (4%) in both groups; compassion fatigue (CF) was high and higher among educators. Healthcare workers showed higher depersonalization (DP) and personal accomplishment (PA). Compassion satisfaction (CS) negatively predicted emotional exhaustion (EE), DP, and CF. Ease of excitation (EOE) increased EE and CF, aesthetic sensitivity (AES) increased CF, while low sensory threshold (LST) increased PA.  Regression: EE: ↓CS (β = −.795), ↑EOE (β = .260); PA: ↑CS (β = .575), ↑LST (β = .214), ↓EOE (β = −.098), ↓healthcare role (β = −1.429); DP: ↓CS (β = −.257), ↓healthcare role (β = −.939); CF: ↑EOE (β = .206), ↑AES (β = .187), ↓CS (β = −.148). R² = .15–.44. Compassion satisfaction turned out to be a protective factor in the intervention target group. |
| 025 | (Conrad & Kellar-Guenther, 2006) | High CF risk in ~50%; high burnout in 7.7%; high CS in ~75%. CS inversely related to CF and burnout (p = .000). Peer support, work meaning, and self-efficacy buffered fatigue effects. High CF with low burnout suggested protective buffering or turnover effects. |
| 026 | Nnubia et al. (2022) | CF: 97.3% moderate; burnout: 95.9% moderate; STS: 70.5% moderate. Psychological well-being: 24.7% low; deficits highest in positive relations (41.8%), purpose (40.4%), growth (34.9%), autonomy (32.9%). Burnout correlated with environmental mastery (r = .212) and purpose (r = .186); STS negatively correlated with positive relations (r = –.231) and self-acceptance (r = –.164). |

*S 3.* Qualitative Findings

| Study ID | Citation |  | Key Qualitative findings |
| --- | --- | --- | --- |
| 001 | Kanmani 2022 | Case study | Teachers invested extra time in differentiated planning due to diverse needs but faced inadequate facilities and adaptive devices. Adapted materials improved engagement, though disruptive behaviours limited interactions and syllabus completion. High stress, compassion fatigue, and burnout were reported, highlighting the need for sensitization programmes and curriculum reform in teacher training. |
| 002 | Sawatske 2024 | Review Article | Special education teacher well being is multidimensional, shaped by personal, workplace, systemic, and contextual factors. Burnout, compassion fatigue, and low self-efficacy drive stress and attrition. Well being includes resilience, job satisfaction, and professional identity, requiring integrated psychological–organizational frameworks. |
| 003 | Paterson 2021 | Conceptual/theoretical paper | Compassion fatigue is distinct from burnout, driven by emotional labour and trauma exposure. Teacher attributions influence fatigue, while zero-tolerance policies increase stress. Trauma-informed, relational approaches, reflective supervision, systemic support, and compassion satisfaction serve as key protective factors. |
| 004 | Ziaian-Ghafari 2019 | Qualitative Phenomenological Inquiry | Compassion fatigue emerged as cumulative exhaustion from student crises, workload, resource gaps, emotional demands, isolation, and weak administrative support. Peer support, coping strategies, professional development, and recognition buffered effects. Impacts included emotional exhaustion, reduced job satisfaction, and withdrawal. |
| 005 | (Tepper & Palladino, 2007) | Case study | Severe student aggression was the main stressors, intensified by safety risks, restraint demands, inadequate training, and poor parental involvement. Principal support strongly moderated stress. Teachers recommended hands-on training, early exposure to challenging behaviours, and stress-management preparation. |
| 006 | (Davis & Palladino, 2011) | Case study | High caseloads, administrative burden, and extended work hours were offset by strong team collaboration and principal support. Coping relied on psychotherapy skills and teamwork. Pre service gaps included limited practical exposure, emphasizing the value of extended, diverse internships and collaborative school cultures. |
| 007 | Oberg et al. 2023 | Review Article | This review argued that high levels of burnout are associated with teacher absenteeism and teacher attrition. Teachers who frequently support traumatized students are vulnerable to developing CF and these teachers may experience emotional exhaustion, anxiety, and insomnia. Compassion satisfaction, teacher self-efficacy and supportive school environments were listed as protective factors. |
| 008 | (Geoffrion et al., 2015) | Review Article | This review article synthesized existing literature available on compassion fatigue among child protection workers and conceptualized how professional identity(PI) moderated CF. For instance, the stress alone does not lead to CF, instead the interpretation of the stressful events as well as their professional identities mediates emotional outcomes. Individuals with strong and adaptive PI see the stressful events like managing aggressive children as part of their job and not a personal volition resulting in less fatigue. |
| 009 | Hoffman 2007 | Narrative review / multiple case study | Three core themes emerged: loss of control (classroom authority breakdown, staff conflict, rigid administration), responsibility (strong duty orientation, endurance-based coping), and empathy (emotional bonds sustaining commitment despite burnout risk). Teachers showed compassion fatigue symptoms (emotional strain, denial, avoidance, over extension). Staff conflict strongly predicted stress and compassion fatigue. Compassion fatigue effectively explained early-career stress patterns in middle-school special educators. |
